# Supplementary material
Source: Research Square preprint supplement (doi:10.21203/rs.3.rs-9248295/v1)
Supplement: Supplementary file 1 [file b05f1703641e62e1c687ad53.docx]

# Definition of the indices based on the SDGs

## SDG 2 – Zero hunger and sustainable agriculture

The goal of SDG 2 is to end hunger, achieve food security and improved nutrition, and promote sustainable agriculture. The indicators covered by the index described here are indicator 2.3 – double the agricultural productivity and income of small-scale food producers – and indicator 2.4 – ensure sustainable food production systems and implement resilient agricultural practices that increase productivity and production, help maintain ecosystems, strengthen the capacity for adaptation to climate change and extreme weather conditions, and improve land and soil quality.

The selected index was termed “agricultural productivity” (AP) and is described according to Equation 1:

Equation 1 – AP.

|  |  | **(1)** |
| --- | --- | --- |

Where: “AP” is agricultural productivity (kg/ha);

“TP” is total production (kg);

“TA” is total agricultural area (ha).

The AP measures the productivity of an AFS. It will be used to assess the capacity of one or more machines to increase the productivity of an AFS after the introduction of mechanization. The index can also be used to compare the productivity of different AFS using different machines, or to compare the productivity of the same AFS resulting from the use of different machines. Although AFS are biodiverse systems and each crop has a distinct economic value per kilogram, the focus of this study is on physical productivity, without incorporating the monetary component. This is justified because higher value-added crops generally require higher production costs (Elsoragaby et al. 2019), which would neutralize the economic effects in the comparison. Thus, the AP more directly and objectively represents the productive performance of the systems, without distortions associated with variations in price or cost. Furthermore, because AFS productivity varies from month to month and from year to year depending on the successional stage of the system, this index may be calculated monthly, annually, or as an average across years, provided that the same time frame is used for all comparisons.

## SDG 13 – Climate action

The goal of this SDG is to take urgent action to combat climate change and its impacts. The indicator covered by the indices to be described is indicator 13.1 – strengthen resilience and adaptive capacity to climate-related hazards.

For SDG 13, three indices were defined. The first selected index was termed “hourly greenhouse gas emissions” (HGE) and is described according to Equation 2:

Equation 2 – HGE.

|  |  | **(2)** |
| --- | --- | --- |

Where: “HGE” is hourly greenhouse gas emissions (kg/h);

“C” is machine fuel consumption (L/h);

“F” is emission factor (kg/L).

The HGE quantifies the mass of greenhouse gases (GHGs) emitted by an agricultural machine per hour of operation and is used to assess and compare the environmental impact of different machines. This time-based approach, rather than an area-based one, is essential in AFS, where the managed area is usually smaller relative to the total area; thus, the HGE makes it possible to identify the machines that are most efficient and best adapted to each type of AFS. Based on specific emission factors, the index makes it possible to assess the climatic impact of operations and to promote the use of technologies with a lower carbon footprint in the agricultural sector. The GHG emission factor for diesel is 2.9 kg GHG/L (Ağbulut and Sarıdemir 2021). Among the gases emitted, carbon dioxide (CO2) stands out as the main pollutant and as the equivalence unit used to quantify the other GHGs. The CO2 emission factor for diesel is 2.6 kg CO2/L and may reach 3.1 kg CO2/L when the average value of 0.5 kg CO2/L emitted during fuel production and distribution is taken into account; similarly, gasoline has an emission factor of 2.28 kg CO2/L, which may reach 2.8 kg CO2/L when emissions related to its production and distribution are included (Carvalho 2011).

The second selected index was termed “traversal efficiency” (TE) and is described according to Equation 3:

Equation 3 – TE.

|  |  | **(3)** |
| --- | --- | --- |

Where: “TE” is traversal efficiency (W/m);

“Pow” is machine power (kW);

“T” is the operating time variable of the machine in the total area (h);

“Spe” is the machine speed variable (km/h).

The TE represents power per unit distance traveled, that is, the amount of power associated with each meter traveled by the machine during operation. The association between power and distance is based on the amount of power (Pow) that remained after the energy used for traction and/or implement actuation to perform the work and that was available to reach the determined speed (Spe) during the required operating time (T). Thus, the index is based on the distance traveled by the machine, as is the Field Traversing Efficiency (FTE) index (Zhou et al. 2020). The TE is relevant for identifying, in each scenario, the most efficient and suitable machines in the sense that they operate with lower power demand to accomplish the work (perform the traversal), as well as for identifying situations of excess and waste (high power for low coverage). Therefore, lower TE values are more desirable, as they represent machines that, with lower power, travel greater distances, that is, require less “power per distance”.

“Pow” represents machine power, expressing its capacity for traction and implement actuation to perform the work. In the context of family farming, Pow is essential for defining the type of implement that the machine is capable of operating, the work rate, and the demands for fuel and maintenance. Machines with adequate power can reduce labor effort and working time without requiring excessive consumption that increases costs, GHG emissions, machine maintenance, and operational complexity – an aspect that is especially relevant in AFS, where space and biodiversity impose operational constraints. In this way, Pow is important for analyzing the balance between operational performance, energy waste, and negative climatic impacts, and is therefore fundamental for guiding the choice of the most suitable machines.

“T” represents the total time, in hours, that an agricultural machine takes to manage the total area of an AFS. This approach is important because, in AFS, the effective area available for mechanization tends to be smaller than the total area (due to the presence of trees), and the use of total time (rather than time per hectare) allows a more precise assessment of machine adaptability to different AFS structures. With this in mind, this value is best obtained directly from machine operation in the AFS; however, when this value has been obtained in hours per hectare (h/ha), it must be converted into total hours using the trafficable area of the specific AFS as the reference (commonly the inter-row area). Lower values indicate greater operational efficiency due to shorter periods of GHG emissions and shorter mechanized operation times in family farming systems.

“Spe” represents the working speed of the machine, indicating how quickly it performs its functions in agroforestry management. Higher speeds are desirable, as they reflect greater dynamic capacity by reducing the time required for the operation and, thus, optimizing field performance.

## SDG 15 – Life on land

The goal of this SDG is to protect, restore, and promote the sustainable use of terrestrial ecosystems, sustainably manage forests, combat desertification, halt and reverse land degradation, and halt biodiversity loss. The indicators covered by the indices to be described are indicator 15.1 – ensure the conservation, restoration, and sustainable use of terrestrial ecosystems; indicator 15.2 – implement sustainable forest management, halt deforestation, restore degraded forests, and increase afforestation and reforestation; indicator 15.3 – combat desertification and restore degraded land and soil; and indicator 15.5 – reduce the degradation of natural habitats, halt biodiversity loss, and prevent the extinction of threatened species.

For SDG 15, five indices were defined. The first selected index was termed “passage margin” (PM) and is described according to Equation 4:

Equation 4 – PM.

|  |  | **(4)** |
| --- | --- | --- |

Where: “PM” is passage margin (m);

“TW” is the trafficable width in the AFS (m);

“MWi” is machine width (m).

The PM index is defined as the difference between the trafficable width in an AFS and the machine width. This index assesses the adaptability of a machine to operate in AFS based on the dimensional compatibility between the space available in the inter-rows and the machine width, determining whether it can move safely and efficiently. The variable “TW” corresponds to the average inter-row width minus a safety buffer intended to prevent machines from traveling too close to the trees, thereby avoiding damage to the planting rows. If PM is greater than zero, the machine has an adequate passage margin, indicating good adaptability; if it is equal to zero, it occupies exactly the available space; and if it is negative, the machine is too wide to travel properly through the inter-rows. In summary, the PM index reflects the physical capacity of the machine to operate within the restricted limits defined by tree planting, and it is therefore crucial for selecting equipment that minimizes interference and preserves the spaces where machine traffic does not occur.

The second selected index was termed “operational coverage” (OC) and is described according to Equation 5:

Equation 5 – OC.

|  |  | **(5)** |
| --- | --- | --- |

Where: “OC” is the operational coverage of the machine (m);

“OWi” is the operating width (m);

“MWi” is the machine width (m).

The OC index is calculated as the difference between the machine’s operating width and its physical width. It measures the machine’s ability to operate laterally beyond its own structure, which is common in equipment such as sprayers, costal brushcutters and some seeders, whose operating width is greater than the machine width. In AFS, certain machines may operate over or between tree rows, and this advantage can be captured by this index.

When the OC value is greater than zero, the machine covers a wider area than its own width, reducing the number of passes and, consequently, traffic and soil compaction. If OC is equal to zero, the operation occurs exactly within the machine width, with no gain in coverage. A negative OC, in turn, indicates that the machine operates with a working width smaller than its own structure, which limits operational efficiency, as occurs with furrowers or equipment with lateral action, requiring more passes and increasing the impact on the soil. Thus, the OC index assesses the efficiency of the machine in expanding its coverage area, which is fundamental for optimized operations in AFS under family farming.

The third selected index was termed “traffic-free area” (TFA) and is described according to Equation 6:

Equation 6 – TFA.

|  |  | **(6)** |
| --- | --- | --- |

Where: “TFA” is the traffic-free area (m²);

“TA” is the total agricultural area (m²);

“TTA” is the tire/track traffic area (m²).

The TFA index is calculated as the difference between the total agricultural area and the area effectively trafficked by machine tires or tracks. This index is intended to quantify and highlight how much of the area remains free from traffic and compaction, thus reflecting the degree of soil preservation in AFS. In AFS, a higher TFA reflects a greater presence of trees, which make these areas non-trafficable, resulting in less machine traffic, lower impact, and a higher level of environmental conservation. Conversely, lower values suggest that the machine travels over a larger portion of the total area and that the AFS has low tree density, which may compromise the soil and vegetation. Thus, TFA serves as a direct indicator of the physical interference caused by machines in the agroforestry environment and seeks to identify machines that operate efficiently even in environments with physical constraints.

The use of total agricultural area as the reference, rather than only the trafficable area in AFS (inter-rows), is intentional. This is because AFS with a greater number of tree rows tend to have less space for machine traffic (fewer inter-rows), which consequently results in a smaller effectively trafficked area and a higher TFA value. This approach favors more tree-based systems, since the resulting index becomes higher as machine traffic decreases relative to the total area, highlighting the conservation of soil structure and ecosystem.

The variable TTA, which represents the tire/track traffic area (Silva et al. 2016; Augustin et al. 2019) – that is, the strips of area impacted by machine passage – is obtained by multiplying three components: (i) total inter-row length (TIL), which refers to the sum of all inter-row segments through which the machine can travel; (ii) number of machine passes (NMP), which refers to the number of times the machine must travel through the inter-rows to complete the task; and (iii) traffic lane width (TLW), which refers to the sum of the widths of the rear tires or tracks of the machine – preferably, only the rear tires are considered, since their trajectories generally overlap with those of the front tires; however, if there is no overlap, TLW must include the sum of the non-overlapping widths of all tires that contact the soil during operation. The variable TTA is obtained according to Equation 7:

Equation 7 – TTA.

|  |  | **(7)** |
| --- | --- | --- |

Where: “TTA” is the tire/track traffic area (m²);

“TIL” is the total inter-row length (m);

“NMP” is the number of machine passes;

“TLW” is the traffic lane width (m).

The fourth selected index was termed “soil compaction” (SC) and is described according to Equation 8:

Equation 8 – SC.

|  |  | **(8)** |
| --- | --- | --- |

Where: “SC” is the soil compaction index (kg/m²);

“MWe” is the machine weight (kg);

“TCA” is the tire/track contact area (m²).

The SC index is calculated as the ratio between machine weight and the contact area of the tires or tracks with the soil. It quantifies the pressure exerted by the machine on the soil, functioning as a direct indicator of compaction potential. This index was described by Albiero et al. (2011a) as “stress on the soil.” Higher SC values indicate greater pressure per unit area, suggesting a higher risk of compaction. Conversely, lower values indicate that the weight is better distributed, with less impact on the soil. Thus, the lower the machine weight and the greater the contact area, the better the efficiency in controlling compaction, favoring the conservation of soil quality in AFS.

The fifth and final selected index was termed “areal density of diverse forest biomass” (DFB) and is described according to Equation 9:

Equation 9 – DFB.

|  |  | **(9)** |
| --- | --- | --- |

Where: “DFB” is the areal density of diverse forest biomass (kg/ha);

“TTW” is the total tree weight of the AFS (kg);

“Odum” is the Odum diversity index;

“TA” is the total agricultural area (ha).

The DFB index is used to assess the ecological contribution of AFS based on the amount of tree biomass and the diversity of forest species. DFB measures, per unit of agricultural area, the weight of forest biomass weighted by species richness, combining quantity and ecological quality in a single index. It does not directly assess agricultural machines, but rather the environmental outcome of the AFS configuration. For example, two systems with the same area and management may present very different DFB values: a consortium with high diversity of forest species will have a significantly higher DFB than a homogeneous system with low diversity, such as an integrated crop-livestock-forest (ICLF) system with eucalyptus monoculture. Therefore, DFB is an indicator of the conservation, regeneration, and ecological sustainability capacity of AFS. It provides a robust measure for comparing AFS in terms of forest structure and biodiversity, making it possible to identify configurations that are more favorable to the protection and restoration of ecosystems, in accordance with the principles of SDG 15.

The variable TTW, which represents the total tree weight of the system, is obtained by summing the weight of each tree in the system, according to Equation 10:

Equation 10 – TTW.

|  |  | **(10)** |
| --- | --- | --- |

Where: “TTW” is the total tree weight of the AFS (kg);

“ITW” is the individual tree weight (kg).

Individual tree weight, in turn, takes into account diameter at breast height (DBH), a parameter widely used in biomass estimation. Individual tree weight is obtained by Equation 11 given below, an allometric equation described by Arevalo et al. (2002) that represents total tree biomass (stem, branches, and leaves) and is widely used in the literature (Froufe et al. 2011; Rocha et al. 2017; Siqueira et al. 2020; Guimarães et al. 2021).

Equation 11 – ITW.

|  |  | **(11)** |
| --- | --- | --- |

Where: “ITW” is the individual tree weight (kg);

“DBH” is the stem diameter at breast height (cm).

The variable Odum, which represents the forest diversity component, is incorporated through the Odum index (Thukral 2017; Neto et al. 2021), which weights biomass by species richness and the relative abundance of individuals, thus reflecting both the diversity and the ecological complexity of the system. The higher the index value, the greater the diversity. The Odum index is obtained according to Equation 12:

Equation 12 – Odum.

|  |  | **(12)** |
| --- | --- | --- |

Where: “Odum” is the Odum diversity index;

“S” is the total number of tree species;

“N” is the total number of tree individuals.

# Definition of the dimensionless numbers

## Data processing

One of the requirements for applying the Dimensional Analysis method is that all indices must be expressed in the same system of units (Back 1983; Albiero et al. 2011b; Morais et al. 2025). This requirement ensures that, as a result of this method, the indices can be unified into quantities free of units (dimensionless), thereby facilitating decision-making.

Accordingly, the units of the indices were standardized so that the essence of the variations being evaluated would not be compromised. The system of units adopted to maintain consistency among the values was the International System of Units (SI), in which the fundamental quantities of mass (M), length (L), and time (T) are expressed, respectively, in kilogram, meter, and second, as shown in Table 1.

**Table 1** International System of Units (SI) for the MLT dimensions.

| **Quantity** | **Unit (SI)** | **Symbol (SI)** |
| --- | --- | --- |
| Mass (M) | kilogram | kg |
| Length (L) | meter | m |
| Time (T) | second | s |

As a result, the units of the indices were converted into SI units, the method is presented in Table 2:

**Table 2** Dimensional conversion of the indices.

| **Index name** | **Index symbol** | **Obtained dimension** | **Conversion factor** | **Dimension (SI)** |
| --- | --- | --- | --- | --- |
| Agricultural productivity | AP | kg/ha | × 1/10,000 | kg/m² |
| Hourly GHG emissions | HGE | kg/h | × 1/3600 | kg/s |
| Traversal efficiency | TE | W/m | × 1 | kg.m/s³ |
| Passage margin | PM | m | × 1 | m |
| Operational coverage | OC | m | × 1 | m |
| Traffic-free area | TFA | m² | × 1 | m² |
| Soil compaction | SC | kg/m² | × 1 | kg/m² |
| Areal density of diverse forest biomass | DFB | kg/ha | × 1/10,000 | kg/m² |

## Conversion of the indices into generic variables

The second step of the method consists of decomposing the units of measurement of the indices into the basic dimensions of mass [M], length [L], and time [T], as shown in Table 3 below:

**Table 3** Dimensional conversion of the indices into generic variables.

| **Generic variable** | **Index name** | **Index symbol** | **Basic dimension** |
| --- | --- | --- | --- |
| K1 | Traversal efficiency | TE | [M] . [L] . [T]⁻³ |
| K2 | Passage margin | PM | [L] |
| K3 | Operational coverage | OC | [L] |
| K4 | Soil compaction | SC | [M] . [L]⁻² |
| K5 | Areal density of diverse forest biomass | DFB | [M] . [L]⁻² |
| K6 | Agricultural productivity | AP | [M] . [L]⁻² |
| K7 | Hourly GHG emissions | HGE | [M] . [T]⁻¹ |
| K8 | Traffic-free area | TFA | [L]² |

## Dimensional matrix

The third step is to construct Table 4, a matrix composed of the exponents of the basic dimensions (M, L, and T) of each index analyzed in the experiment.

**Table 4** Dimensional matrix.

|  | K1 | K2 | K3 | K4 | K5 | K6 | K7 | K8 |
| --- | --- | --- | --- | --- | --- | --- | --- | --- |
| M | 1 | 0 | 0 | 1 | 1 | 1 | 1 | 0 |
| L | 1 | 1 | 1 | -2 | -2 | -2 | 0 | 2 |
| T | -3 | 0 | 0 | 0 | 0 | 0 | -1 | 0 |

## Subspace matrix

This matrix is obtained by selecting the three indices from the Dimensional Matrix considered most important for calculating the π-terms of the phenomenon. This explains why the vector subspace of the phenomenon under study is three-dimensional (M, L, and T). Next, cross-calculations are performed to test the characteristic of the matrix. The three selected indices were K6, K7, and K8, corresponding, respectively, to the indices AP, HGE, and TFA, because they fully cover the fundamental dimensions (M, L, T) and each reflects one of the three SDGs that guide mechanization in family-based AFS: AP provides the socioeconomic outcome of the operation aligned with SDG 2, since without productivity there is neither food security nor justification for mechanization; HGE quantifies the climatic cost of the operation, meeting SDG 13; and TFA represents the conservation space within the AFS, where there is no machine traffic (tree-covered area), corresponding to SDG 15.

With this set, any generated π-term integrates productivity, climatic impact, and ecosystem conservation, thereby providing a complete dimensionless model for evaluating agroforestry mechanization. The subspace matrix is presented in Table 5 below:

**Table 5** Subspace considered for characteristic testing.

| K6 | K7 | K8 |
| --- | --- | --- |
| 1 | 1 | 0 |
| -2 | 0 | 2 |
| 0 | -1 | 0 |

Any determinant must be different from zero. The determinant of this subspace is equal to -2, thus confirming that the characteristic of the general subspace is 3, representing a three-dimensional subspace.

## System of linear equations

There are three equations derived from the Dimensional Matrix. These equations are obtained by multiplying the exponents of each index by the corresponding “K” wherever they occur (that is, wherever they are different from zero), according to Equation 13, Equation 14, and Equation 15. The sum of these values must be set equal to zero for each corresponding [M], [L], and [T], because the result of this homogeneous linear system will define the π-terms, and since these are dimensionless, the sum of the exponents of their basic dimensions [M], [L], and [T] must be equal to zero, which requires the equations of the algebraic operators (Kn) to also be equal to zero.

Equation 13 – [M].

|  |  | **(13)** |
| --- | --- | --- |

Equation 14 – [L].

|  |  | **(14)** |
| --- | --- | --- |

Equation 15 – [T].

|  |  | **(15)** |
| --- | --- | --- |

With these equations defined, they are solved as a function of K6, K7, and K8, yielding Equation 16, Equation 17, and Equation 18:

Equation 16 – K6.

|  |  | **(16)** |
| --- | --- | --- |

Equation 17 – K7.

|  |  | **(17)** |
| --- | --- | --- |

Equation 18 – K8.

|  |  | **(18)** |
| --- | --- | --- |

## Definition of the π-terms

The π-terms were obtained from the Solution Matrix. This matrix is constructed from the eight K values arranged in the System of Linear Equations and represented by the three main indices (K6, K7, and K8). The rows of this Matrix generate the π-terms. The number of π-terms is determined by subtracting the dimension of the phenomenon subspace (3) from the number of K indices (8), resulting in five dimensionless π-terms responsible for explaining the studied phenomenon. The Solution Matrix is presented in Table 6:

**Table 6** Solution matrix.

|  | K1 | K2 | K3 | K4 | K5 | K6 | K7 | K8 |
| --- | --- | --- | --- | --- | --- | --- | --- | --- |
| π 1 | 1 | 0 | 0 | 0 | 0 | 2 | -3 |  |
| π 2 | 0 | 1 | 0 | 0 | 0 | 0 | 0 |  |
| π 3 | 0 | 0 | 1 | 0 | 0 | 0 | 0 |  |
| π 4 | 0 | 0 | 0 | 1 | 0 | -1 | 0 | 0 |
| π 5 | 0 | 0 | 0 | 0 | 1 | -1 | 0 | 0 |

The values in the rows of the solution matrix are the exponents of the components of the π-terms, presented below in their generic arithmetic form:

The specified form of the π-terms is presented below in Equation 19, Equation 20, Equation 21, Equation 22, and Equation 23:

Equation 19 – π1.

|  |  | **(19)** |
| --- | --- | --- |

Equation 20 – π2.

|  |  | **(20)** |
| --- | --- | --- |

Equation 21 – π3.

|  |  | **(21)** |
| --- | --- | --- |

Equation 22 – π4.

|  |  | **(22)** |
| --- | --- | --- |

Equation 23 – π5.

|  |  | **(23)** |
| --- | --- | --- |

## Correlation matrix

The correlation matrix is determined based on the results of the π-term calculations for each treatment, in order to make explicit the pairs of statistically correlated π-terms (binomials), which will be used to compose the dimensionless graphs (next step). The importance of identifying these binomials lies in allowing the identification of the graphs that exhibit the strongest correlations, which is essential for the proper interpretation of the results.

## Dimensionless graphs

The final step is to construct the dimensionless graphs, taking into account the binomials that show strong correlation coefficients, greater than 0.7 and less than -0.7 (Schober and Schwarte 2018). The binomials vary in each experiment depending on the values of the input variables, that is, the measurements of a given machine operating in a specific AFS arrangement.

# References

Ağbulut Ü, Sarıdemir S (2021) A general view to converting fossil fuels to cleaner energy source by adding nanoparticles. Int J Ambient Energy 42:1569–1574. https://doi.org/10.1080/01430750.2018.1563822;PAGE:STRING:ARTICLE/CHAPTER

Albiero D, Maciel AJ da S, Gamero CA (2011a) Desenvolvimento e projeto de colhedora de babaçu (Orbignya phalerata Mart.) para agricultura familiar nas regiões de matas de transição da Amazônia. Acta Amaz 41:57–68. https://doi.org/10.1590/S0044-59672011000100007

Albiero D, Maciel AJS, Gamero CA, et al (2011b) Dimensional analysis of soil properties after treatment with the rotary paraplow, a new conservationist tillage tool. Spanish J Agric Res 9:693–701. https://doi.org/10.5424/SJAR/20110903-329-10

Arevalo LA, Alegre JC, Vilcahuaman LJM (2002) Metodologia para Estimar o Estoque de Carbono em Diferentes Sistemas de Uso da Terra. Colombo: Embrapa Florestas, 2002, Colombo, Paraná

Augustin K, Kuhwald M, Brunotte J, Duttmann R (2019) FiTraM: A model for automated spatial analyses of wheel load, soil stress and wheel pass frequency at field scale. Biosyst Eng 180:108–120. https://doi.org/10.1016/J.BIOSYSTEMSENG.2019.01.019

Back N (1983) Metodologia de projeto de produtos industriais. Guanabara Dois, Rio de Janeiro, RJ

Carvalho CHR De (2011) Emissões relativas de poluentes do transporte motorizado de passageiros nos grandes centros urbanos brasileiros. Brasília, DF

Elsoragaby S, Yahya A, Mahadi MR, et al (2019) Energy utilization in major crop cultivation. Energy 173:1285–1303. https://doi.org/10.1016/J.ENERGY.2019.01.142

Froufe LCM, Rachwal MFG, Seoane CES (2011) Potencial de sistemas agroflorestais multiestrata para sequestro de carbono em áreas de ocorrência de Floresta Atlântica. Pesqui Florest Bras 31:143–154. https://doi.org/10.4336/2011.pfb.31.66.143

Guimarães TP, Maneschy RQ, Oliveira IK de S, et al (2021) Sequestro de carbono em sistemas silvipastoris de regeneração natural da agricultura familiar, São Domingos do Araguaia - PA / Carbon separation in silvipastoral systems of natural regeneration of family farming, São Domingos do Araguaia - PA. Brazilian J Anim Environ Res 4:4721–4728. https://doi.org/10.34188/BJAERV4N3-148

Morais GF de, Han D, Santos J da SG, et al (2025) Dimensional analysis of the adequacy of agricultural machinery for biomass handling in agroforestry systems. Rev Bras Eng Agrícola e Ambient 29:e290222. https://doi.org/10.1590/1807-1929/agriambi.v29n10e290222

Neto EM de L, Biondi D, Pinheiro FAP, et al (2021) Índices ecológicos para a gestão da arborização de ruas de Boa Vista-RR. Rev da Soc Bras Arborização Urbana 16:21–34. https://doi.org/10.5380/REVSBAU.V16I1.77163

Rocha WDO, Pereira AM, Silva AE da, Fraga JA (2017) Estimativa de biomassa vegetal e sequestro de carbono no Parque Natural Municipal Flor do Ipê, Várzea Grande, MT. Multitemas 22:. https://doi.org/10.20435/multi.v22i51.1284

Schober P, Schwarte LA (2018) Correlation coefficients: Appropriate use and interpretation. Anesth Analg 126:1763–1768. https://doi.org/10.1213/ANE.0000000000002864

Silva RB, Iori P, de Souza ZM, et al (2016) Contact pressures and the impact of farm equipment on Latosol with the presence and absence of sugarcane straw. Ciência e Agrotecnologia 40:265–278. https://doi.org/10.1590/1413-70542016403001716

Siqueira CCZ, Chiba MK, Moreira RS, Abdo MTVN (2020) Carbon stocks of a degraded soil recovered with agroforestry systems. Agrofor Syst 94:1059–1069. https://doi.org/10.1007/S10457-019-00470-9/TABLES/6

Thukral AK (2017) A review on measurement of Alpha diversity in biology. Agric Res J 54:1–10. https://doi.org/10.5958/2395-146X.2017.00001.1

Zhou K, Bochtis D, Jensen AL, et al (2020) Introduction of a New Index of Field Operations Efficiency. Appl Sci 10:329. https://doi.org/10.3390/APP10010329
